# Supplementary material
Source: PubMed Central journal article supplement (PMC3045012)

# Supplemental Figure 1

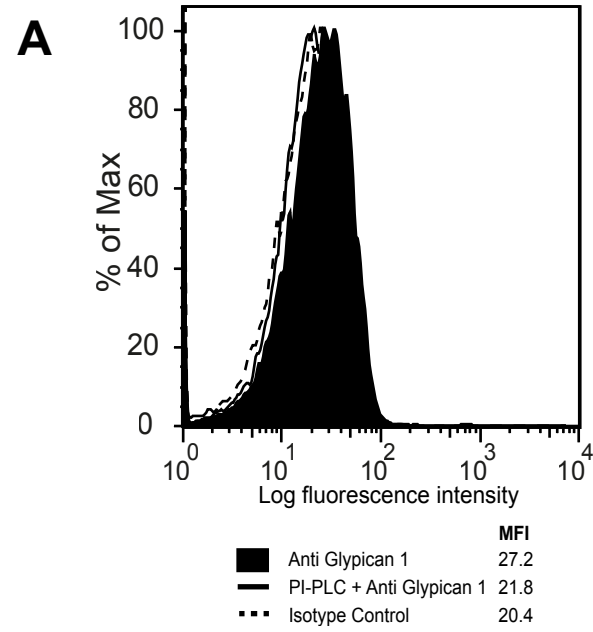

**B**

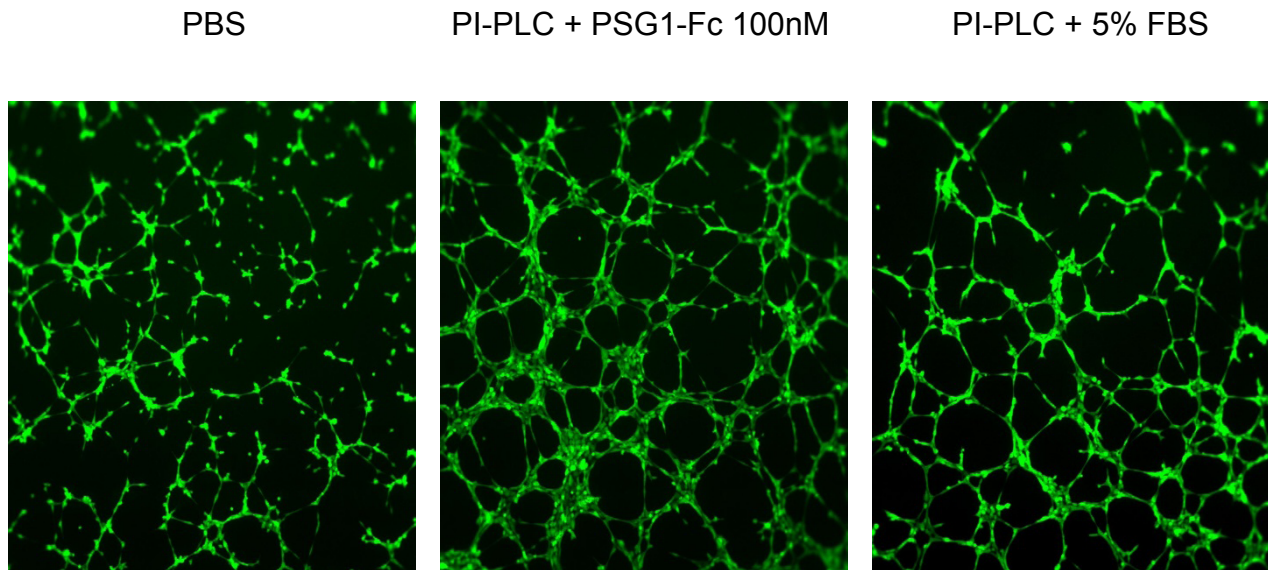

**C**

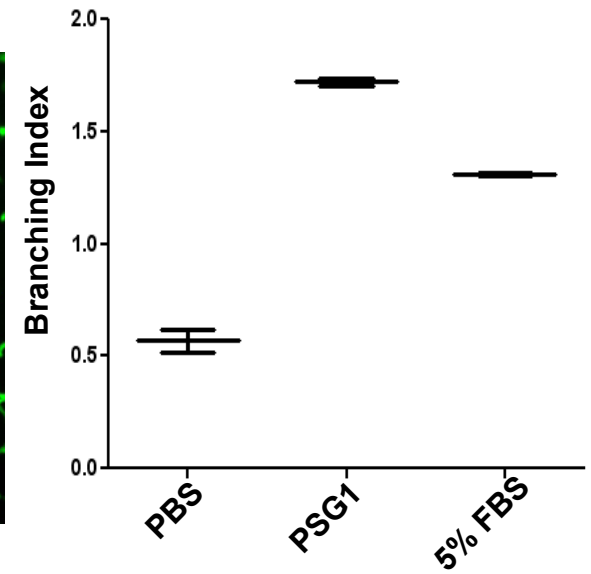

Supplement: supp_M110.161810_jbc.M110.161810-1.pdf [file supp_M110.161810_jbc.M110.161810-1.pdf]
